# Supplementary material
Source: MDPI journal article supplement (https://www.mdpi.com/2073-4441/13/11/1452)
Supplement: s1 [file s1 › water-1205251-supplementary.pdf]

## Article

# Understanding Microbial Loads in Wastewater Treatment Works as Source Water for Water Reuse

Hodon Ryu <sup>1</sup>, Yao Addor <sup>2</sup>, Nichole E. Brinkman <sup>1</sup>, Michael W. Ware <sup>2</sup>, Laura Boczek <sup>1</sup>, Jill Hoelle <sup>1</sup>, Jatin H. Mistry <sup>3</sup>, Scott P. Keely <sup>2</sup> and Eric N. Villegas <sup>2,\*</sup>

<sup>1</sup> United States Environmental Protection Agency, Office of Research and Development, Center for Environmental Solutions and Emergency Response, Cincinnati, OH 45268, USA; ryu.hodon@epa.gov (H.R.); brinkman.nichole@epa.gov (N.E.B.); boczek.laura@epa.gov (L.B.); hoelle.jill@epa.gov (J.H.)

<sup>2</sup> United States Environmental Protection Agency, Office of Research and Development, Center for Environmental Measurement and Modeling, Cincinnati, OH 45268, USA; addorys@mail.uc.edu (Y.A.); ware.michael@epa.gov (M.W.W.); keely.scott@epa.gov (S.P.K.)

<sup>3</sup> United States Environmental Protection Agency, Region 6, Dallas, TX 75270, USA; mistry.jatin@epa.gov

\* Correspondence: villegas.eric@epa.gov

**Citation:** Ryu, H.; Addor, Y.; Brinkman, N.E.; Ware, M.W.; Boczek, L.; Hoelle, J.; Mistry, J.H.; Keely, S.P.; Villegas, E.N. Understanding Microbial Loads in Wastewater Treatment Works as Source Water for Water Reuse. *Water* **2021**, *13*, 1452. <https://doi.org/10.3390/w13111452>

Academic Editor: Andreas N. Angelakis

Received: 16 April 2021

Accepted: 19 May 2021

Published: date

**Publisher's Note:** MDPI stays neutral with regard to jurisdictional claims in published maps and institutional affiliations.

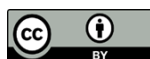

**Copyright:** © 2021 by the authors. Submitted for possible open access publication under the terms and conditions of the Creative Commons Attribution (CC BY) license (<https://creativecommons.org/licenses/by/4.0/>).

**Table S1.** Sample volume collected (SVC), equivalent sample volume analyzed (ESVA)\*\*, and detection limit (DL)\*\* for each testing microorganism.

| Sampling Site* | Sample Type | Sample Volume (SVC) | Parasites  |                  | Adenovirus |            | Bacteriophages |             | Bacterial Indicators |                 |
|----------------|-------------|---------------------|------------|------------------|------------|------------|----------------|-------------|----------------------|-----------------|
|                |             |                     | ESVA       | DL ((oo)cysts/L) | ESVA       | DL (MPN/L) | ESVA           | DL (PFU/mL) | ESVA                 | DL (CFU/100 mL) |
| Influent       | Grab        | 1 L                 | 100–125 mL | 8–10             | 400 mL     | 2.5        | 1 mL           | 1           | 100 mL               | 1               |
|                | HFUF        | 100 L               | ND         | ND               | ND         | ND         | ND             | ND          | ND                   | ND              |
| Effluent       | Grab        | 1 L                 | ND         | ND               | ND         | ND         | 1 mL           | 1           | 100 mL               | 1               |
|                | HFUF        | 100 L               | 10–100 L   | 0.01–0.1         | 50 L       | 0.02       | 250 mL         | 0.004       | ND                   | ND              |

\*Influent samples: primary treated wastewater (e.g., primary clarified/settled), Effluent samples: final treated wastewater (e.g., secondary treatment and disinfection). \*\*Calculations were described in Tables 2–4. ND: not determined.

**Table S2.** Median Log<sub>10</sub> reduction values of protozoan parasites through the three wastewater treatment trains. Minimum-Maximum Log<sub>10</sub> values are in parenthesis.

| Log Reduction [Log <sub>10</sub> (Inf/eff)] | <i>Cryptosporidium</i> Oocysts | <i>Giardia</i> Cysts |
|---------------------------------------------|--------------------------------|----------------------|
| Plant 1 (UV)                                | 1.89<br>(0.97–3.00)            | 1.42<br>(0.11–2.40)  |
| Plant 2 (Chlorine)                          | 2.98<br>(0.77–5.15)            | 3.18<br>(0.81–5.83)  |
| Plant 3 (Chlorine)                          | 1.75<br>(1.19–2.90)            | 1.90<br>(0.53–4.01)  |

**Table S3.** Median Log<sub>10</sub> inactivation values of human adenovirus and bacteriophages through the three wastewater treatment trains. Minimum-Maximum Log<sub>10</sub> values are in parenthesis.

| Log Inactivation [Log <sub>10</sub> (Inf/eff)] | Male Specific Bacteriophage | Somatic Bacteriophage | Human Adenovirus    |
|------------------------------------------------|-----------------------------|-----------------------|---------------------|
| Plant 1 (UV)                                   | 5.54<br>(3.85–6.26)         | 5.50<br>(4.94–5.97)   | 4.57<br>(1.15–6.08) |
| Plant 2 (Chlorine)                             | 6.01<br>(3.59–6.38)         | 5.61<br>(4.33–6.21)   | 2.91<br>(1.85–5.85) |
| Plant 3 (Chlorine)                             | 5.50<br>(3.32–6.07)         | 5.29<br>(3.32–6.49)   | 3.27<br>(2.66–5.37) |

**Table S4.** Median Log<sub>10</sub> inactivation values of fecal indicator organisms through the three wastewater treatment trains. Minimum-Maximum Log<sub>10</sub> values are in parenthesis.

| Log Inactivation [Log <sub>10</sub> (Influent/effluent)] | <i>E. coli</i>      | Fecal Coliforms     | Total Coliforms     | Aerobic Endospores  |
|----------------------------------------------------------|---------------------|---------------------|---------------------|---------------------|
| Plant 1 (UV)                                             | 6.02<br>(4.30–8.35) | 5.73<br>(2.79–7.73) | 5.12<br>(3.82–6.95) | 1.45<br>(0.43–2.91) |
| Plant 2 (Chlorine)                                       | 6.56<br>(5.30–8.51) | 6.58<br>(5.72–8.38) | 5.68<br>(4.72–7.72) | 1.23<br>(0.40–3.29) |
| Plant 3 (Chlorine)                                       | 6.66<br>(4.75–8.45) | 6.80<br>(4.88–8.52) | 6.16<br>(2.76–7.42) | 1.21<br>(0.99–2.28) |

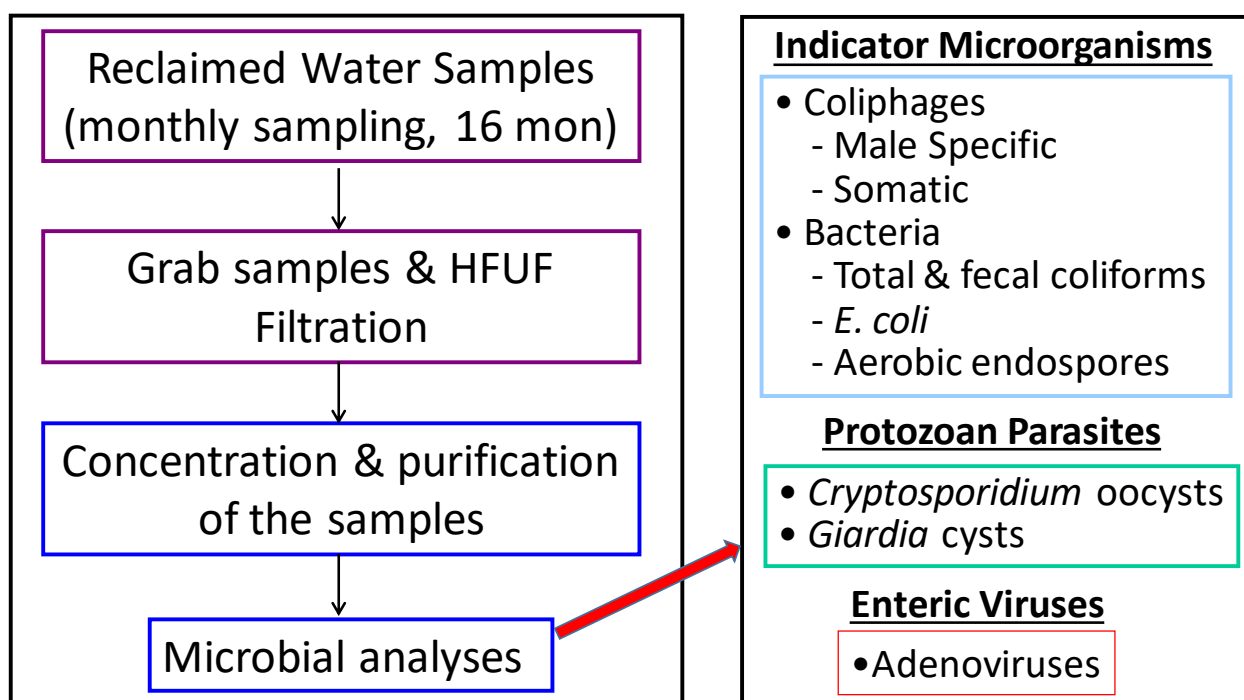

Figure S1. Overview of sampling schedule and microbial parameters measured.

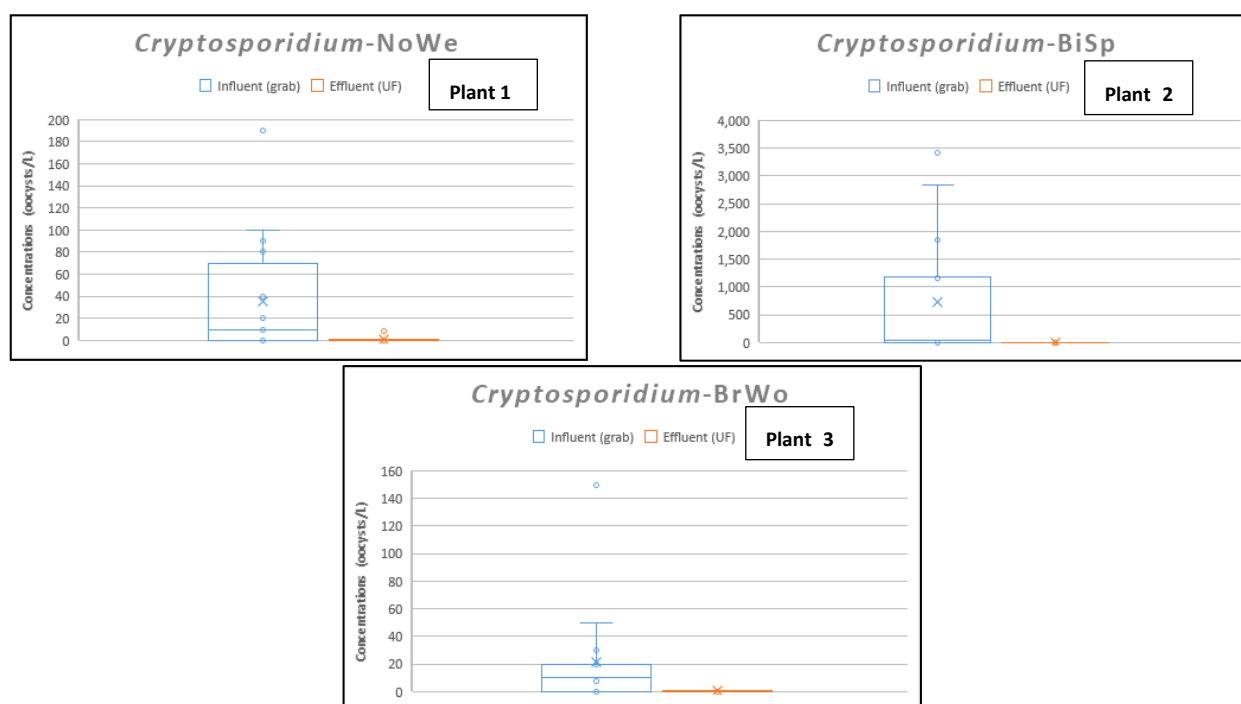

Figure S2. *Cryptosporidium* oocyst concentrations in influent (blue) and effluent (red) wastewater samples.

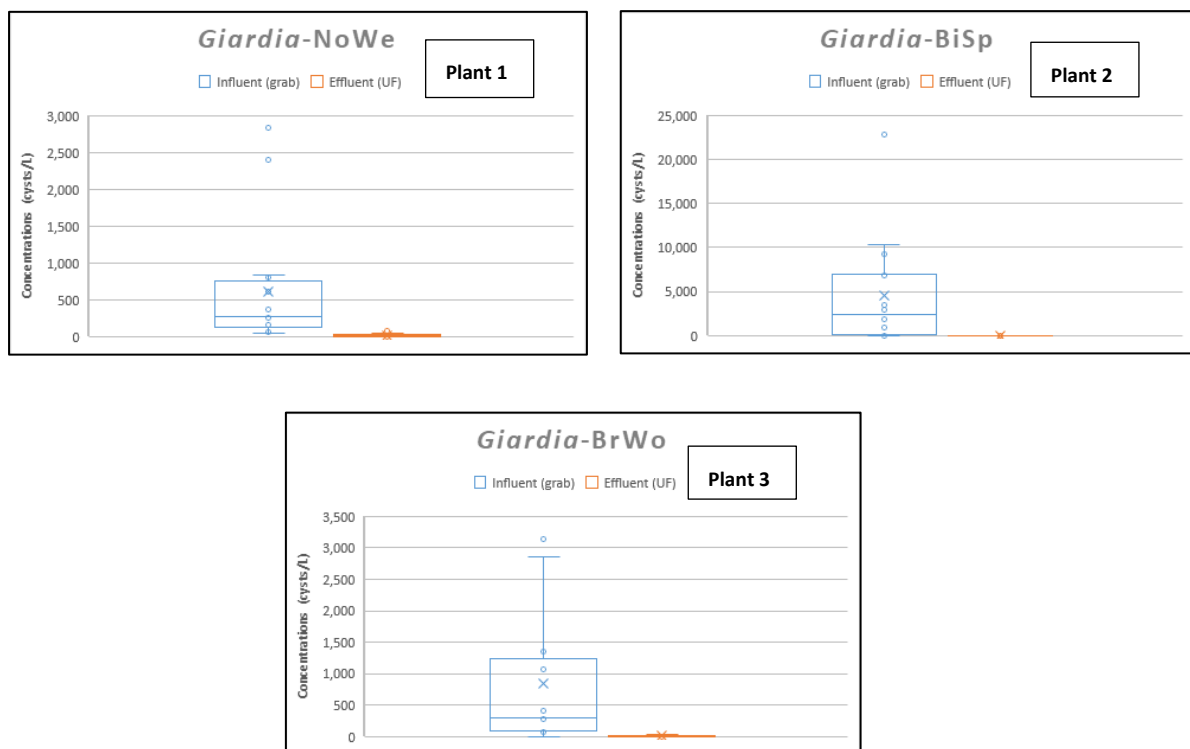

**Figure S3.** *Giardia* cyst concentrations in influent (blue) and effluent (red) wastewater samples.

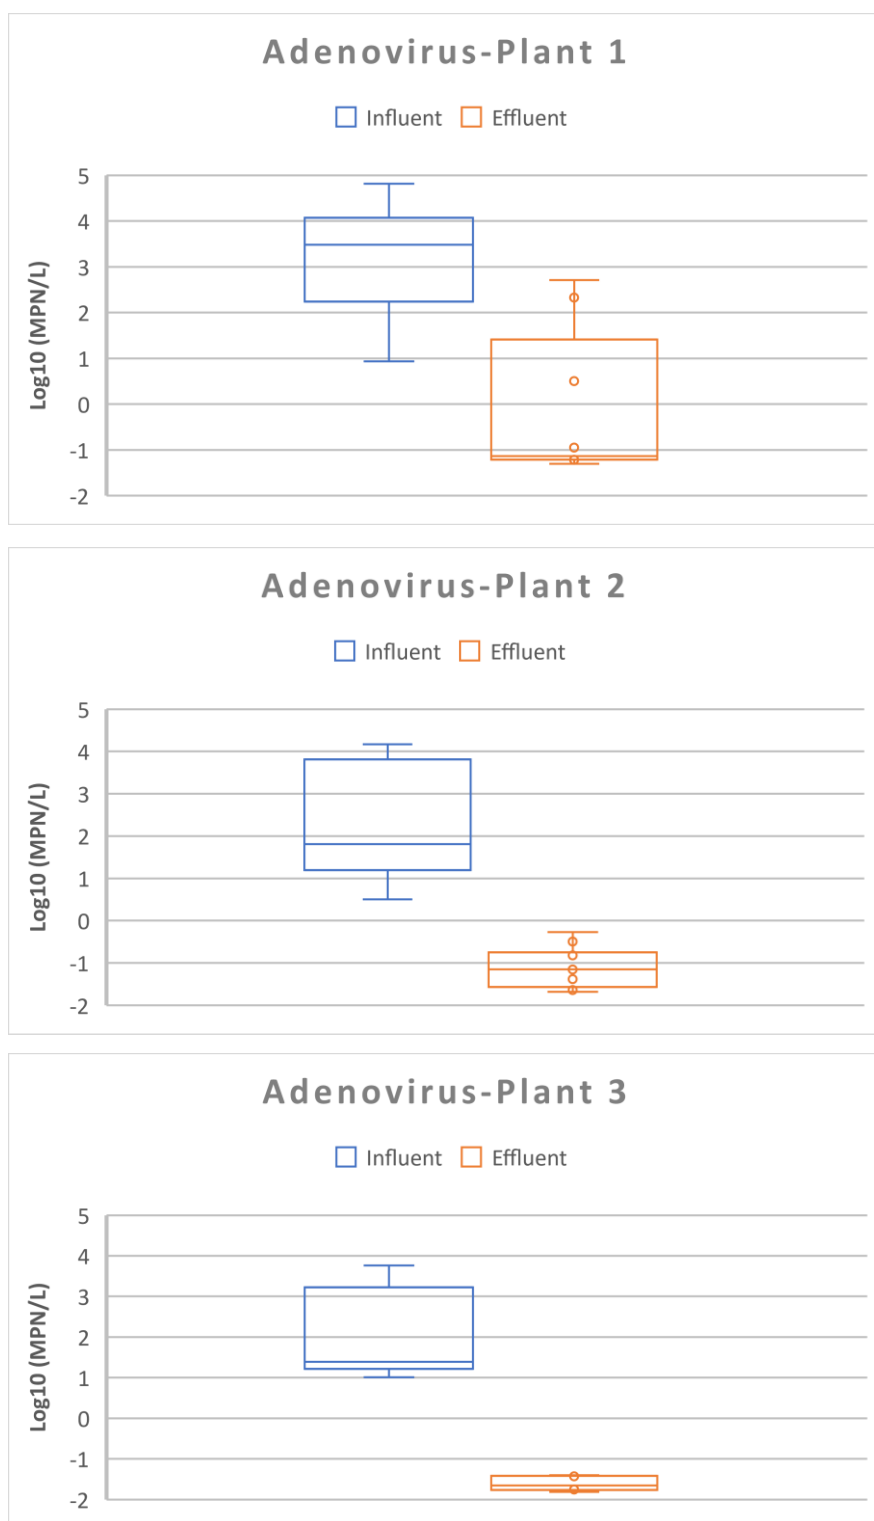

**Figure S4.** Log<sub>10</sub> concentrations of infectious human adenovirus in influent (blue) and effluent (red) wastewater samples.

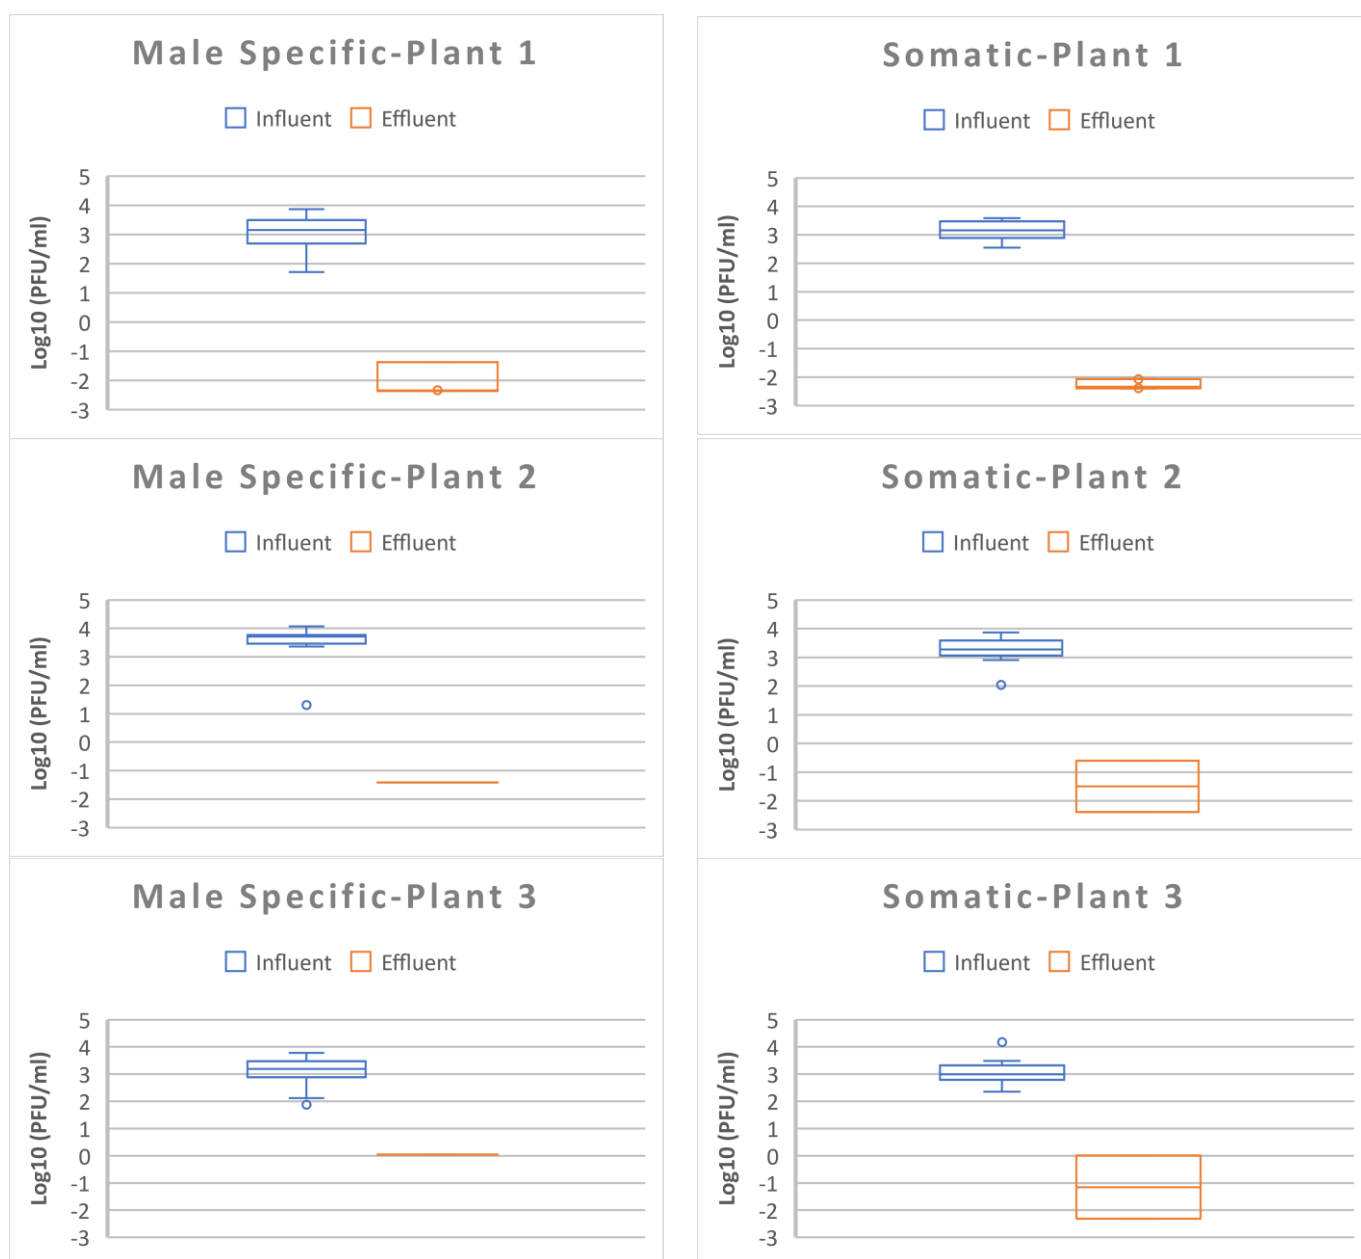

**Figure S5.** Log<sub>10</sub> concentrations of male specific and somatic coliphages in influent (blue) and effluent (red) wastewater samples.
